# Supplementary material
Source: publisher figshare collection journal article supplement (https://diabetesjournals.figshare.com/articles/dataset/_/17185826)
Supplement: Supplementary file 2 [file 1]

## Supplementary Figure 2

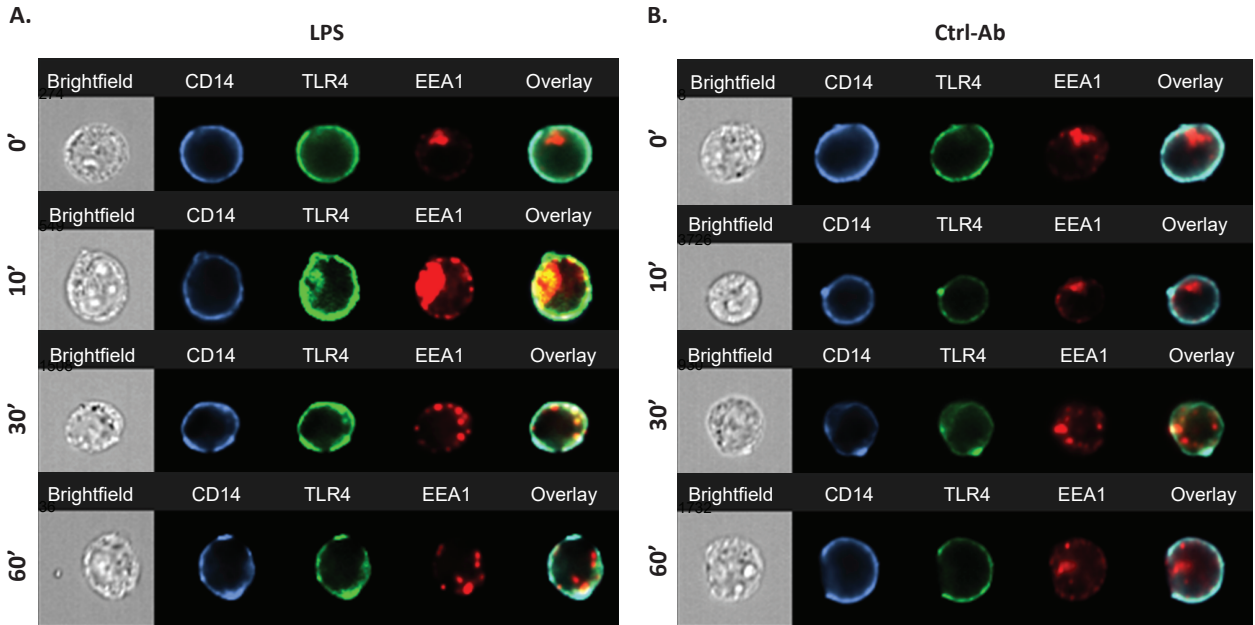

**Supplementary Figure 2. Rapid internalization of TLR4 in response to LPS and subsequent return to the cell surface but no internalization in Ctrl-Ab treated cells.** HEK-Blue cells (Invivogen) expressing TLR4/MD2/CD14 were pulsed with LPS (100ng), or Ctrl-Ab (100ng) for 5 min, washed, and then fixed at the noted time points. Cells were stained (CD14, TLR4/SA15-21, EEA1) for imaging flow cytometry and 10,000 events were collected for each population. Representative images for (A) LPS- and (B) Ctrl-Ab- stimulated HEKBlue cells are shown for each time point.
