# Supplementary material
Source: publisher figshare collection journal article supplement (https://diabetesjournals.figshare.com/articles/dataset/_/17185826)
Supplement: Supplementary file 3 [file 1]

**Supplementary Table 1. Differentially expressed genes and gene ontologies (GOs) from Figure 3.**

| Upregulated genes | Downregulated Genes |
|-------------------|---------------------|
| CEBPE             | LYPD6B              |
| TINAGL1           | ALS2CL              |
| ANKRD22           | TDRP                |
| GPR84             | TMIE                |
| CHI3L1            | ALPK1               |
| CD177             | RAMP3               |
| SLCO4C1           | VIPR1               |
| OLFM4             | LEF1                |
| C15orf48          | RYR3                |
| LTF               | CNGA1               |
| LCN2              | ADH1C               |
| PRTN3             | AMPD1               |
| ICA1              |                     |
| OLR1              |                     |
| MS4A3             |                     |
| MAPK13            |                     |
| S100A8            |                     |
| ANXA1             |                     |
| CTSG              |                     |
| FPR2              |                     |
| PADI4             |                     |
| CDKN3             |                     |
| ELANE             |                     |
| UPP1              |                     |
| ANXA3             |                     |
| CAMP              |                     |
| ABCA13            |                     |
| RHOA              |                     |
| ORM1              |                     |
| CHIT1             |                     |
| 5-Sep             |                     |
| S100A9            |                     |

## Upregulated GOs

|                                                                 |
|-----------------------------------------------------------------|
| RAGE receptor binding                                           |
| neutrophil aggregation                                          |
| Myeloid Cells, GN.Arth.SynF, CD11b+ Ly6-G+, Synovial Fluid      |
| abnormal innate immunity                                        |
| B cells, MLP.BM, CD19- IgM- CD43+ CD24- AA4.1+ CD45R-           |
| Myeloid Cells, MF.BM, B220neg CD3neg Ly-6C/Glo CD115int         |
| Neutrophil-specific genes up-regulated                          |
| B cells, MLP.FL, CD19- IgM- CD43+ CD24intermediate              |
| abnormal immune cell physiology                                 |
| cytokine production                                             |
| altered susceptibility to bacterial infection                   |
| phagocytosis                                                    |
| Genes down-regulated in CD133+                                  |
| Myeloid Cells, GN.Thio.PC, CD11b+ Ly6-G+, Peritoneal Cavity     |
| Genes up-regulated in bone marrow-derived macrophages           |
| endocytosis                                                     |
| Network of differentially expressed myeloid genes.              |
| neutrophil mediated immunity                                    |
| abnormal cell-mediated immunity                                 |
| phospholipase A2 inhibitor activity                             |
| Genes significantly up-regulated in the blood mononuclear cells |
| intracellular ligand-gated ion channel activity                 |
| Genes up-regulated in monocyte-derived dendritic cells          |
| Genes up-regulated in comparison of CD4 T                       |
| defense response to other organism                              |
| defense response to bacterium                                   |
| Genes down-regulated in monocyte-derived dendritic cell ...     |
| Toll-like receptor 4 binding                                    |
| arachidonic acid binding                                        |
| abnormal neutrophil physiology                                  |
| leukocyte migration                                             |
| Myeloid Cells, MF.Sbcaps.SLN, CD11b+ CD169+ F4/80-              |
| response to bacterium                                           |
| leukocyte migration involved in inflammatory response           |
| inflammatory response                                           |
| abnormal adaptive immunity                                      |
| cytoplasmic, membrane-bounded vesicle                           |
| abnormal hematopoietic system physiology                        |
| chitin binding                                                  |
| Myeloid Cells, Mo.6C+II-.BM, B220neg CD3neg CD115+ Ly-6         |
| B cells, B.PI.AA4-.BM, CD138+ AA4.1- CD43+, Bone marrow         |
| icosanoid binding                                               |
| Genes up-regulated in T cells: CD4                              |
| abnormal leukocyte physiology                                   |
| secretory vesicle                                               |
| Up-regulated genes in myeloid progenitors immortalized          |
| Myeloid Cells, GN.Arth.BM, CD11b+ Ly6-G+, Bone marrow           |
| abnormal response to infection                                  |
| abnormal granulocyte physiology                                 |
| B cells, proB.CLP.BM, CD19- IgM- CD43+ CD24- AA4.1+ CD4         |
| Genes up-regulated in NKT cells versus CD8A.                    |
| Genes up-regulated in CD8 T cells: central memory               |
| interleukin-8 production                                        |

## Downregulated GOs

|                                                             |
|-------------------------------------------------------------|
| Genes up-regulated in CD4 T conv over-expressing GATA1      |
| alpha beta T cells, T.8Nve.Sp, 4- 8+ 25- 62Lhi 44lo, Sp     |
| Genes down-regulated in comparison of regulatory T cell     |
| Genes up-regulated in spleen B lymphocytes versus bone      |
| Genes down-regulated in CD4 T conv over-expressing IKZF     |
| alpha beta T cells, T.4.Pa.BDC, 4+ 8- BDC+, Pancreas, avg-2 |
| Genes down-regulated in comparison of thymus regulatory     |
| Genes down-regulated in comparison of TregLP versus Tconv   |
| Genes down-regulated in comparison of lymph node            |
| Genes down-regulated in CD8 T cells: naïve                  |
| Genes down-regulated in B lymphocytes: ZFX                  |
| Genes down-regulated in CD4 T conv over-expressing LEF1     |
| Genes down-regulated in CD4 [GeneID=920] T cells            |
| alpha beta T cells, T.4Nve.MLN, 4+ 8- 25- 62Lhi 44lo,       |
| CD positive, T.8Nve.Sp.OT1, CD8+ CD45.1+, Spleen,           |
| Genes up-regulated in dendritic cells stimulated by LPS     |
| Genes down-regulated in CXCR5+ BCL6+                        |
| Genes down-regulated in comparison of regulatory T cell     |
| alpha beta T cells, T.4Mem.LN, TCRb CD44high CD122lo CD     |
| CD positive, CD4 Control, 4+8-B220-, Spleen,                |
| Cluster P4 of genes with similar expression profiles        |
| Genes down-regulated in comparison of TregCD103-Klrg1       |
| Genes down-regulated in CD4 [GeneID=920] T conv             |
| Genes up-regulated in CD4 [GeneID=920] versus granulocytes  |
| Genes down-regulated in comparison of regulatory T cell     |
| Genes up-regulated in bone marrow-derived macrophages       |
| Genes up-regulated in comparison of TconvLN versus Treg     |
| alpha beta T cells, T.8Nve.MLN, 4- 8+ 25- 62Lhi 44lo,       |
| alpha beta T cells, T.4.PLN.BDC, 4+ 8- BDC+, Lymph Node     |
